# Supplementary material for: Investigation on dispersion properties of CO2and ester solvent mixtures usingin situFTIR spectroscopy
Source: Royal Society of Chemistry journal article supplement (doi:10.1039/d0ra00326c), 2020-01-01
Supplement: d0ra00326c1.pdf [file d0ra00326c1.pdf]

## Supporting Information

# Investigation on dispersion properties of CO<sub>2</sub> and ester solvents mixtures using *in situ* FTIR spectroscopy

Zihao Yang,<sup>\*a,†</sup> Taiheng Yin,<sup>a,†</sup> Fengfan Zhang,<sup>a</sup> Wei Wu,<sup>a</sup> Meiqin Lin,<sup>\*a</sup> Zhaoxia Dong,<sup>a,b</sup> and Juan Zhang<sup>a</sup>

<sup>a</sup> Unconventional Petroleum Research Institute, China University of Petroleum (Beijing), Beijing, 102249, People's Republic of China. E-mail: zihaoyang@cup.edu.cn (Z.Y.), linmq@cup.edu.cn (M.L.).

<sup>b</sup> China University of Geosciences (Beijing), Beijing, 100083, People's Republic of China

† These authors contributed equally to this work.

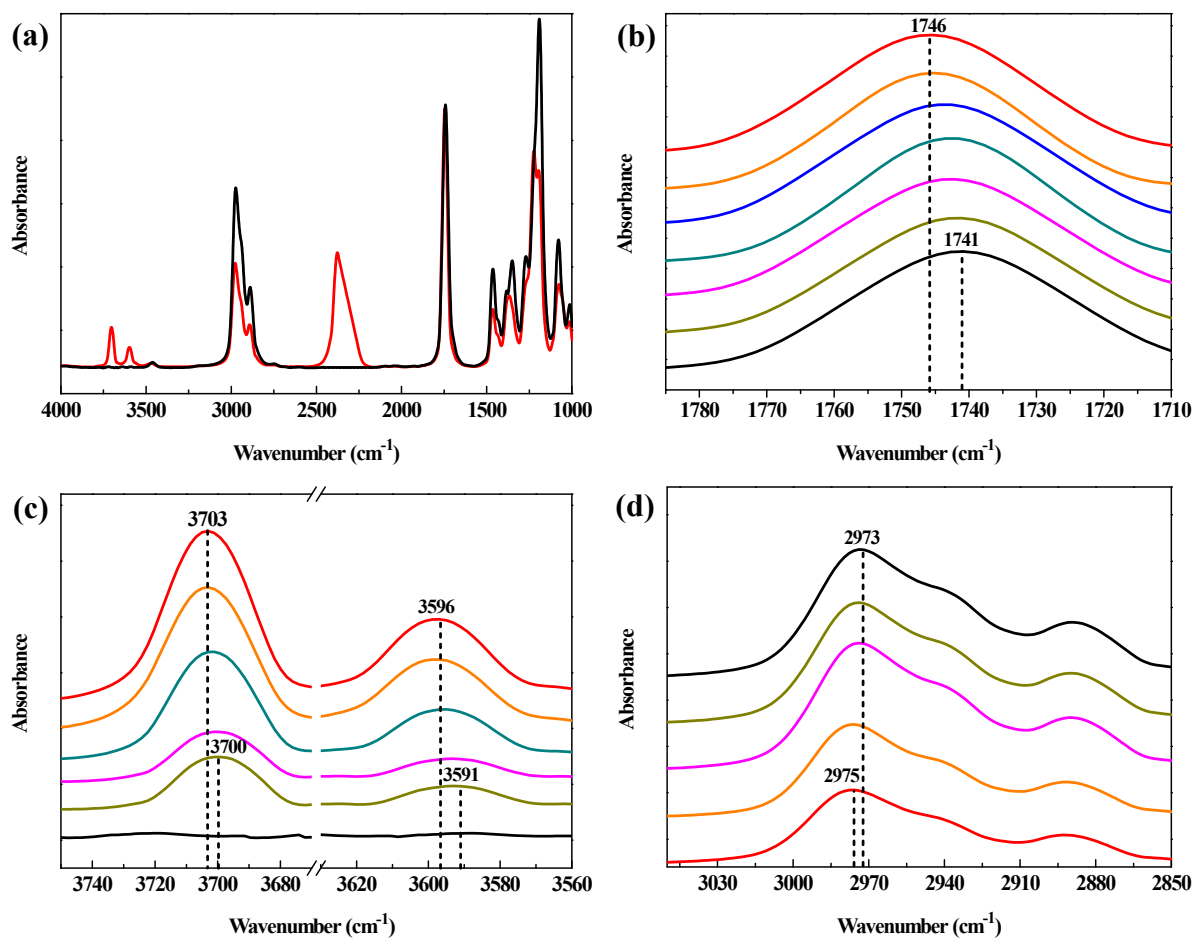

**Fig. S1.** FTIR spectra of CO<sub>2</sub>-propyl propionate system under different pressure conditions: (a) full spectrum; (b) the  $\nu_{\text{C}=\text{O}}$  region of propyl propionate; (c) the combination modes  $2\nu_2 + \nu_3$  and  $\nu_1 + \nu_3$  regions of CO<sub>2</sub> molecules; (d) the  $\nu_{\text{-CH}_3}$  region of propyl propionate. (—) ambient pressure, (—) 1.72 MPa, (—) 2.75 MPa, (—) 3.71 MPa, (—) 4.85 MPa, (—) 5.83 MPa, (—) 7.39 MPa.

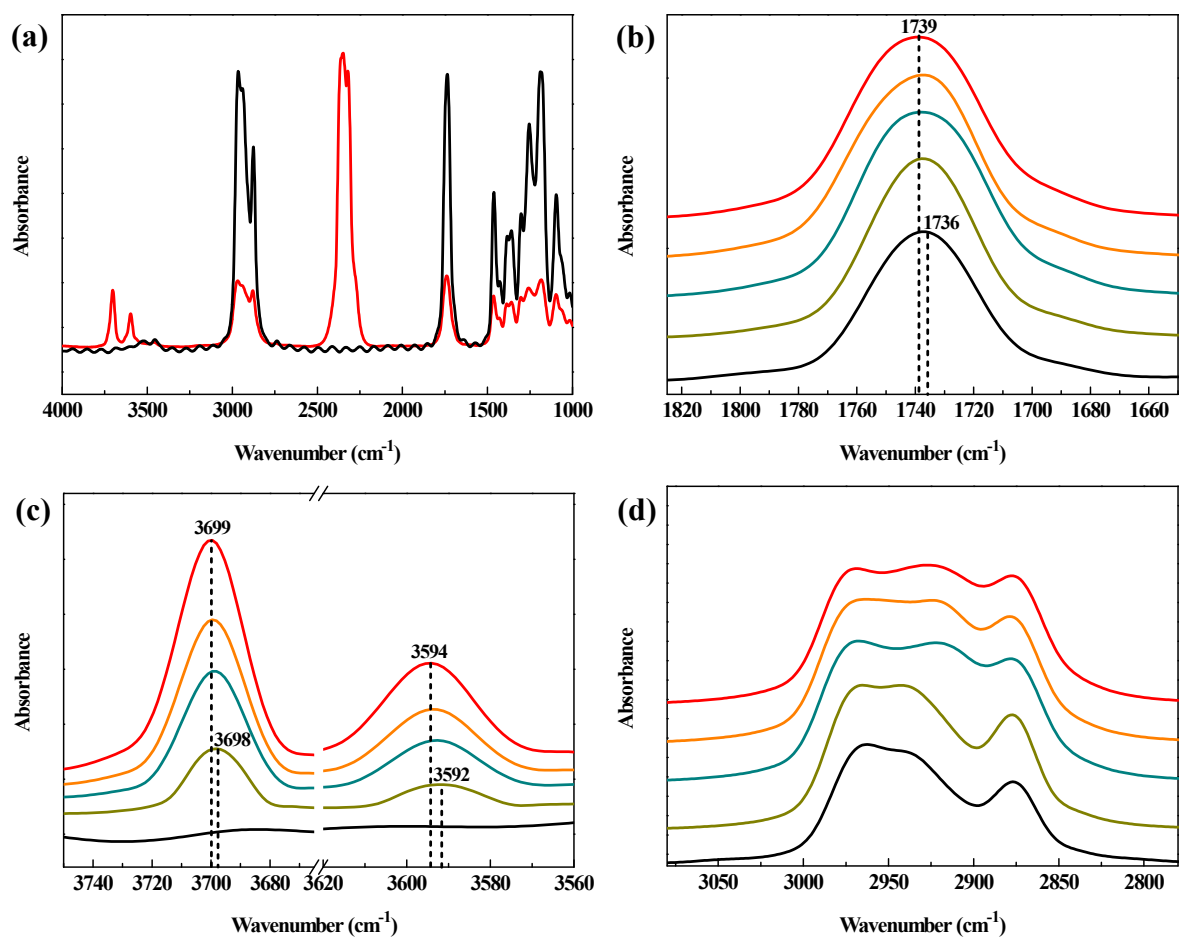

**Fig. S2.** FTIR spectra of CO<sub>2</sub>- butyl butyrate system under different pressure conditions: (a) full spectrum; (b) the  $\nu_{\text{C=O}}$  region of butyl butyrate; (c) the combination modes  $2\nu_2 + \nu_3$  and  $\nu_1 + \nu_3$  regions of CO<sub>2</sub> molecules; (d) the  $\nu_{\text{-CH}_3}$  region of butyl butyrate. (—) ambient pressure, (—) 1.82 MPa, (—) 3.75 MPa, (—) 5.56 MPa, (—) 7.41 MPa.
